# Supplementary material for: Multiple Levels of Triggered Factors and the Obligated Requirement of Cell-to-Cell Movement in the Mutation Repair of Cucumber Mosaic Virus with Defects in the tRNA-like Structure
Source: MDPI journal article supplement (doi:10.3390/biology11071051), 2022-07-13
Supplement: s1 [file s1]

**Table S1.** Plasmids used in this study.

| Mutants             | Original sequences                           | Mutant sequences                                                                                     |
|---------------------|----------------------------------------------|------------------------------------------------------------------------------------------------------|
| pR1-T <sub>m1</sub> | CTAGC <sup>3294</sup> <u>A</u> CAACGTGCTAG   | CTAGC <sup>3294</sup> <u>A</u> <b>GGATCC</b> ACTAGTCCCGGGTGCTAG                                      |
| pR1-T <sub>m2</sub> | CTAGC <sup>3294</sup> <u>A</u> CAACGTGCTAG   | CTAGC <sup>3294</sup> <u>A</u> <b>GGATCC</b> ACTAGTCCCGGGCAACGTGCTAG                                 |
| pR2-T <sub>m1</sub> | CTAGC <sup>2988</sup> <u>A</u> CAACGTGCTAG   | CTAGC <sup>2988</sup> <u>A</u> <b>GGATCC</b> ACTAGTCCCGGGTGCTAG                                      |
| pR2-T <sub>m2</sub> | CTAGC <sup>2988</sup> <u>A</u> CAACGTGCTAG   | CTAGC <sup>2988</sup> <u>A</u> <b>GGATCC</b> ACTAGTCCCGGGCAACGTGCTAG                                 |
| pR3-T <sub>m1</sub> | CTAGC <sup>2152</sup> <u>A</u> CAACGTGCTAG   | CTAGC <sup>2152</sup> <u>A</u> <b>GGATCC</b> ACTAGTCCCGGGTGCTAG                                      |
| pR3-T <sub>m2</sub> | CTAGC <sup>2152</sup> <u>A</u> CAACGTGCTAG   | CTAGC <sup>2152</sup> <u>A</u> <b>GGATCC</b> ACTAGTCCCGGGCAACGTGCTAG                                 |
| pR2-2bPT            | TCTGA <sup>2661</sup> <u>G</u> GCCTCT        | TCTGA <sup>2661</sup> <u>G</u> <b>TAATAGGGATCC</b> ACTAGTCCCGGGGCCTCT                                |
| pR3-M5              | CCGAC <sup>548</sup> <u>G</u> TATGATTGTCCTAT | CCGAC <sup>548</sup> <u>G</u> <b>gcTGcaTGc</b> CCTAT                                                 |
| pR2-2bPT-1          | TCTGA <sup>2661</sup> <u>G</u> GCCTCT        | TCTGA <sup>2661</sup> <u>G</u> <b>TAATAGGGATCC-100 bp fragment from</b><br><b>TVBMV-CCCGGGGCCTCT</b> |
| pR2-2bPT-2          | TCTGA <sup>2661</sup> <u>G</u> GCCTCT        | TCTGA <sup>2661</sup> <u>G</u> <b>TAATAGGGATCC-200 bp fragment from</b><br><b>TVBMV-CCCGGGGCCTCT</b> |

Remarks: The inserted bases were bold, and mutated sites were indicated by low case.

**Table S2.** Primers used in this study.

| DNA Oligos            | Sequence (5'-3')                                        | Purpose                                 |
|-----------------------|---------------------------------------------------------|-----------------------------------------|
| R1-T <sub>m1</sub> -F | <u>TCGGATCC</u> ACTAGTCCCGGTGCTAGTTTCAGGGTACGGGTGC      | Construction of R1-T <sub>m1</sub>      |
| R1-T <sub>m1</sub> -R | ATGGATCCTGCTAGAAGTACACGGACCGAAG                         |                                         |
| R1-T <sub>m2</sub> -F | <u>TCGGATCC</u> ACTAGTCCCGGGCAACGTGCTAGTTTCAGGGTACGGGTG | Construction of R1-T <sub>m2</sub>      |
| R1-T <sub>m2</sub> -R | ATGGATCCTGCTAGAAGTACACGGACCGAAG                         |                                         |
| R2-T <sub>m1</sub> -F | <u>TCGGATCC</u> ACTAGTCCCGGTGCTAGTTTCAGGGTACGGGTGC      | Construction of R2-T <sub>m1</sub>      |
| R2-T <sub>m1</sub> -R | ATGGATCCTGCTAGAAGTACACGGACCGAAG                         |                                         |
| R2-T <sub>m2</sub> -F | <u>TCGGATCC</u> ACTAGTCCCGGGCAACGTGCTAGTTTCAGGGTACGGGTG | Construction of R2-T <sub>m2</sub>      |
| R2-T <sub>m2</sub> -R | ATGGATCCTGCTAGAAGTACACGGACCGAAG                         |                                         |
| R3-T <sub>m1</sub> -F | <u>TCGGATCC</u> ACTAGTCCCGGTGCTAGTTTCAGGGTACGGGTGC      | Construction of R3-T <sub>m1</sub>      |
| R3-T <sub>m1</sub> -R | ATGGATCCTGCTAGAGGTACACGGACCGAAG                         |                                         |
| R3-T <sub>m2</sub> -F | <u>TCGGATCC</u> ACTAGTCCCGGGCAACGTGCTAGTTTCAGGGTACGGGTG | Construction of R3-T <sub>m2</sub>      |
| R3-T <sub>m2</sub> -R | ATGGATCCTGCTAGAGGTACACGGACCGAAG                         |                                         |
| R2-2bPT-F             | <u>TCGGATCC</u> ACTAGTCCCGGGCCTCTCGTTAGAGTTATCGGCG      | Construction of R2-2bPT                 |
| R2-2bPT-R             | ATGGATCCCATTACTCAGACTCGGGTAACTCCGCC                     |                                         |
| TVBMV-7600-F          | ATGGATCCCAGCACCTCTGGATACTCTACTAG                        | Construction of R2-2bPT-1 and R2-2bPT-2 |
| TVBMV-7699-R          | ATCCCGGGATCCCGACACTCCATGGTC                             |                                         |
| TVBMV-7799-R          | ATCCCGGGTGTC AATGAGCTGTCAAAACGACT                       | Construction of R3-M5                   |
| R3-M5-F               | CAACCGACGGCTGCATGCCCTATGGAA                             |                                         |
| R3-M5-R               | TTCCATAGGGCATGCAGCCGTCGGTTG                             |                                         |
| Fny3-pCB301-F         | AGTTCATTTCAATTGGAGAGGGTAATCTTACCACTGTGTGTGTGC           |                                         |
| Fny3-pCB301-R         | GTGGAGATGCCATGCCGACCCTGGTCTCCTTTTGGAGGCC                |                                         |
| pCB301-800-F          | GGGTCGGCATGGCATCTCCA                                    |                                         |
| pCB301-767-R          | CCTCTCCAAATGAAATGAACTTCCTTATATAGAGGA                    |                                         |
| R1-2658-F             | ATGGCTACGAAGGCCCTTC                                     | Detection of TLS mutants in RNA1        |
| R2-2510-F             | AGAATCGACGGAACGAGGT                                     | Detection of TLS and 2b mutants in RNA2 |
| R2-2760-R             | GGGGAGGTTTCAGAAAGCACC                                   | Detection of 2b mutants in RNA2         |
| R3-1385-F             | CCAACTATTAACCAACCAACCTTTGT                              | Detection of TLS mutants in RNA3        |
| R1-R                  | TGGTCTCCTTTTAGAGACCCACG                                 | Detection of TLS mutants in RNA1        |
| R2/3-R                | TGGTCTCCTTTTGGAGGCCCC                                   | Detection of TLS mutants in RNA2/3      |
| R3-1883-F             | GTTATTGTCTACTGACTATATAGAGAGTGTT                         | Clone of the 3' half of larger RNA3     |
| R3-198-F              | AAATGGCTACTGAGTGTGACC                                   | Detection of 3a mutation in RNA3        |
| R3-1040-R             | GCATCGCGTCACAGATGTCTAC                                  |                                         |
| R1-NT-F               | TGTGACCTGTTAAACAGTTTCTTATTG                             | RNA1 probe for northern blot            |
| R1-NT-R               | ACACAATGTGTTTAGTGACTTCAGAC                              |                                         |

|         |                         |                                                  |
|---------|-------------------------|--------------------------------------------------|
| R2-NT-F | AGAGCGCGTTCAAATCTCAGA   | RNA2 probe for northern blot                     |
| R2-NT-R | TTCGTTACCGGCGAACCAAT    |                                                  |
| R3-NT-F | GTACTGGTTTATCAGTATGCCGC | RNA3 and RNA4 probe for northern blot            |
| R3-NT-R | GACTGGGAGCACTCCAGAT     |                                                  |
| CM-NT-F | AAACTGTCTGAAGTCACTAAAC  | CMV genome and subgenome probe for northern blot |
| CM-NT-R | TGGTCTCCTTTTGAGGC       |                                                  |

---

Remarks: Protective bases were displayed in a bold font. Endonuclease sites was displayed by underline. Stop codons was displayed in italics.

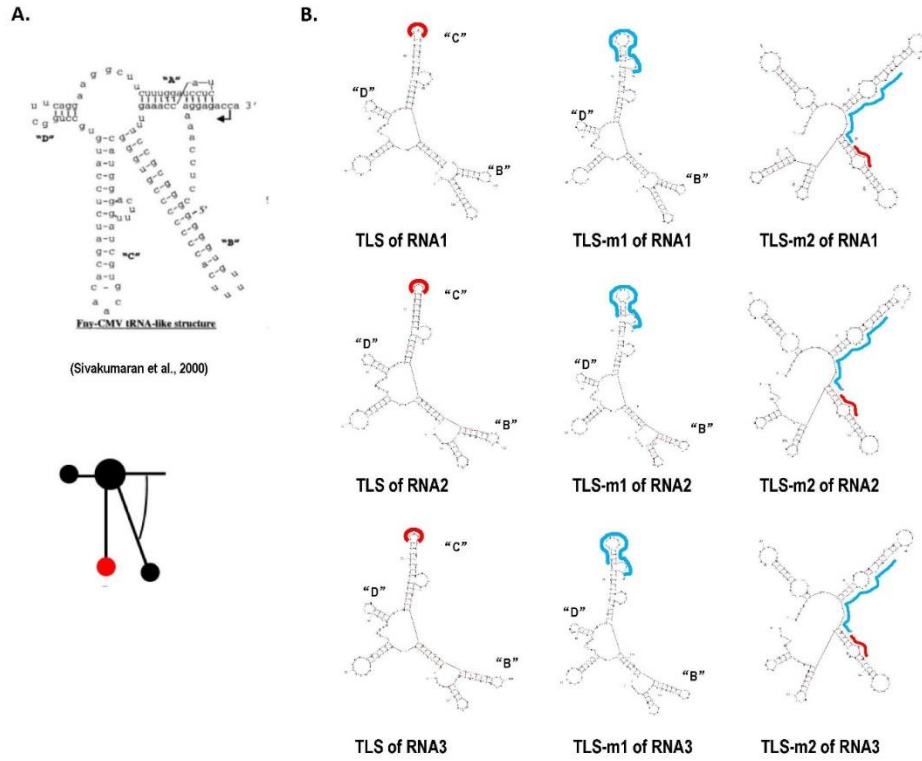

**Figure S1.** Alignment of tRNA-like structure (TLS) region among wt RNAs,  $T_{m1}$  and  $T_{m2}$  mutants of cucumber mosaic virus. Secondary structure of TLS in CMV and corresponding schematic representations. caacg loop was indicated by red color. B. Alignment of TLS among wt RNAs,  $T_{m1}$  and  $T_{m2}$  mutants of CMV. caacg loop sequences were indicated by opened red circles in wt RNAs and red lines in  $T_{m2}$  mutants. 18 nt new sequences were indicated by blue lines.

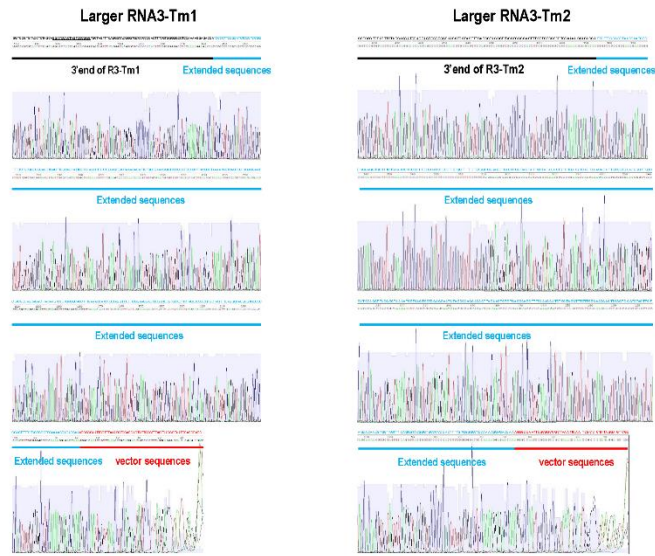

**Figure S2.** Sequencing results of RT-PCR clones: Red nucleotides indicate 18nt insertion sequences in R3-T<sub>m1</sub> and R3-T<sub>m2</sub>. Blue nucleotides indicate the extended sequences. Purple nucleotides indicate vector sequences.

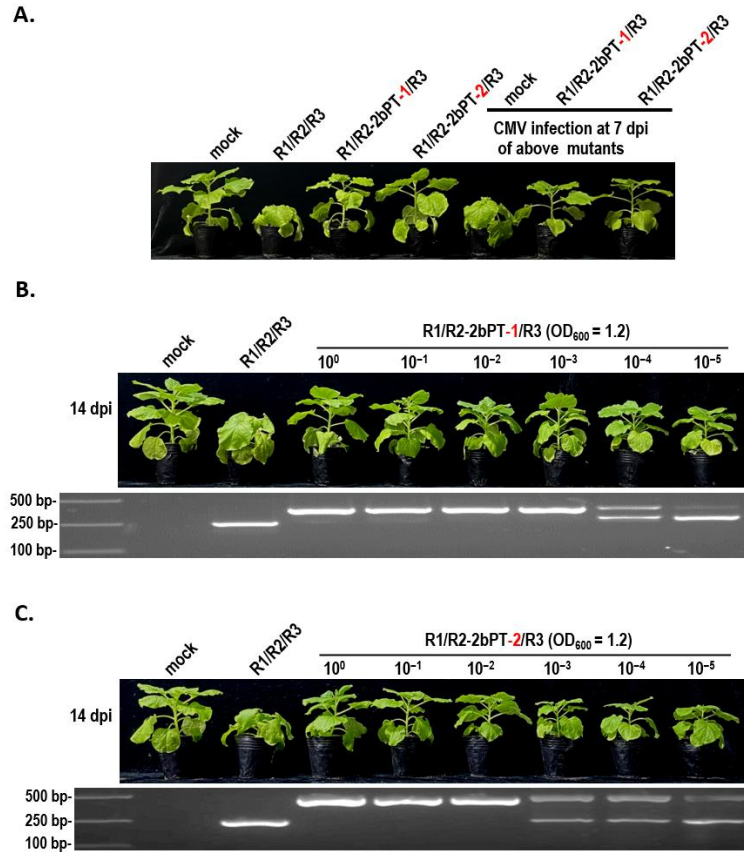

**Figure S3.** Dilution inoculation of attenuated vaccines of CMV and mutant repair assay. (A) Mutants cross protection assay of CMV<sub>Fny</sub>. R1, RNA1 of CMV<sub>Fny</sub>; R2, RNA2 of CMV<sub>Fny</sub>; R3, RNA3 of CMV<sub>Fny</sub>. (B) Mutation repair assay under dilution inoculation of R1/R2-2bPT-1/R3. The PCR products showed a band of 350 bp indicating all mutants were existent; the PCR products showed two bands of 250 bp and 350 bp indicating part of the mutants were repaired to wild-type RNA2. (C) Mutation repair assay under dilution inoculation of R1/R2-2bPT-2/R3. The PCR products showed a band of 450 bp indicating all mutants were existent; the PCR products showed two bands of 250 bp and 450 bp indicating part of the mutants were repaired to wild-type RNA2.
